# Supplementary material
Source: MDPI journal article supplement (https://www.mdpi.com/2076-3417/11/4/1959)
Supplement: s1 [file s1]

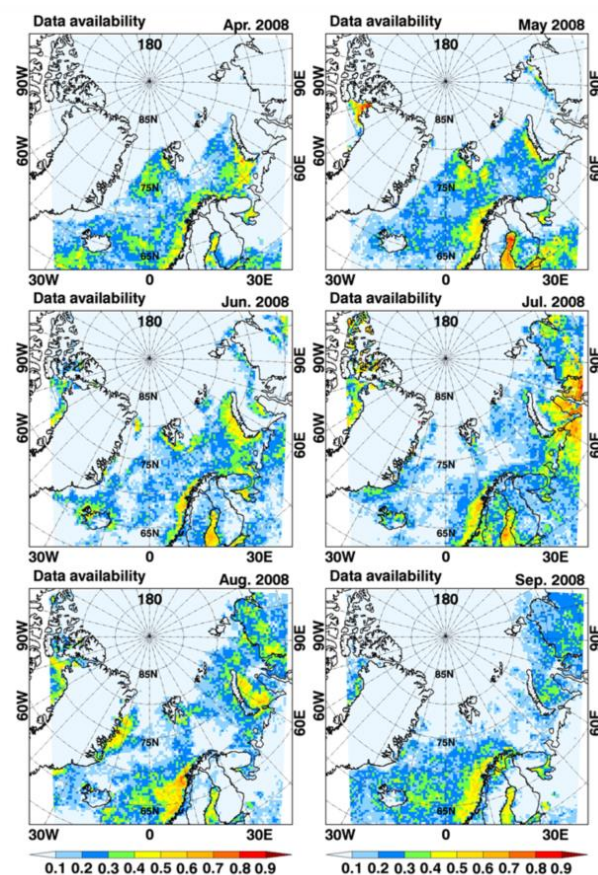

**Figure S1.** Spatiotemporal map of the monthly availability of the MODIS AOD product for the entire domain

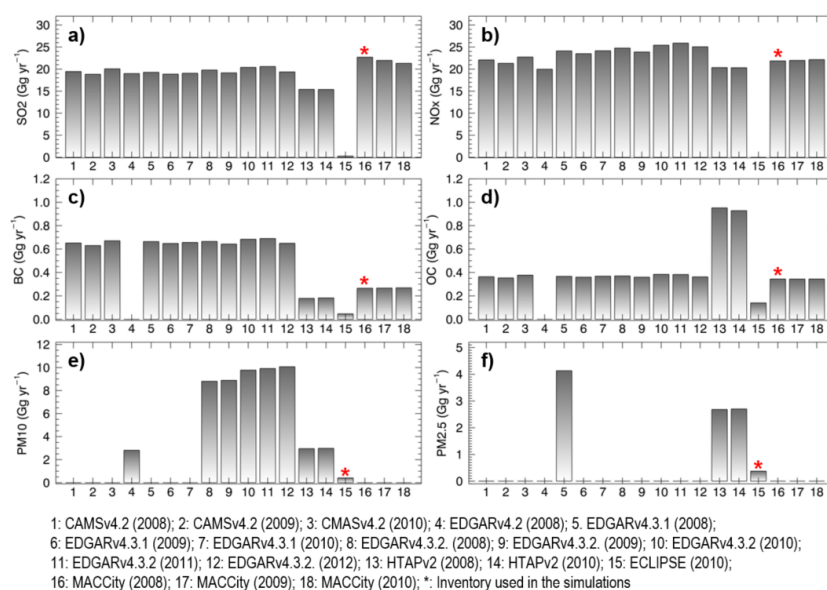

**Figure S2.** Annual emission fluxes of (a)  $\text{SO}_2$ , (b)  $\text{NO}_x$ , (c) BC, (d) OC, (e)  $\text{PM}_{10}$ , (f)  $\text{PM}_{2.5}$  for the regions ( $70^\circ\text{N}$ – $90^\circ\text{N}$ ;  $60^\circ\text{W}$ – $60^\circ\text{E}$ ) from the eighteen inventories

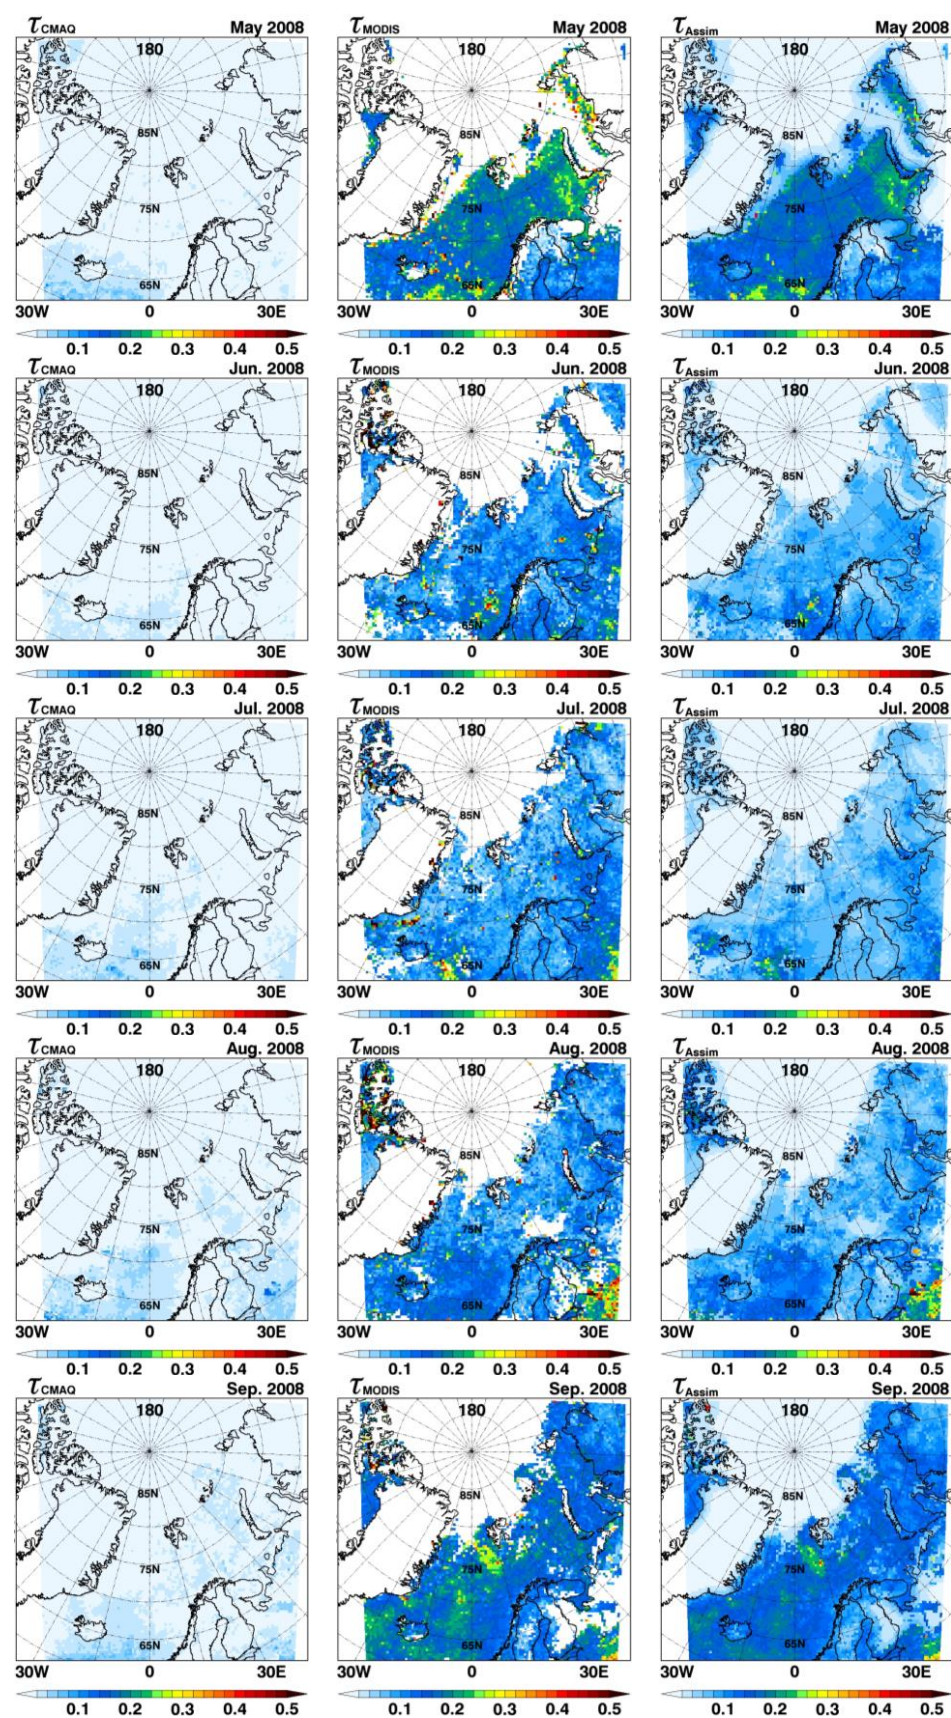

**Figure S3.** Spatial distributions of the CMAQ model-estimated (first column), MODIS-observed (second column), and assimilated (third column) AODs over the Arctic from April 2008 to September 2008.



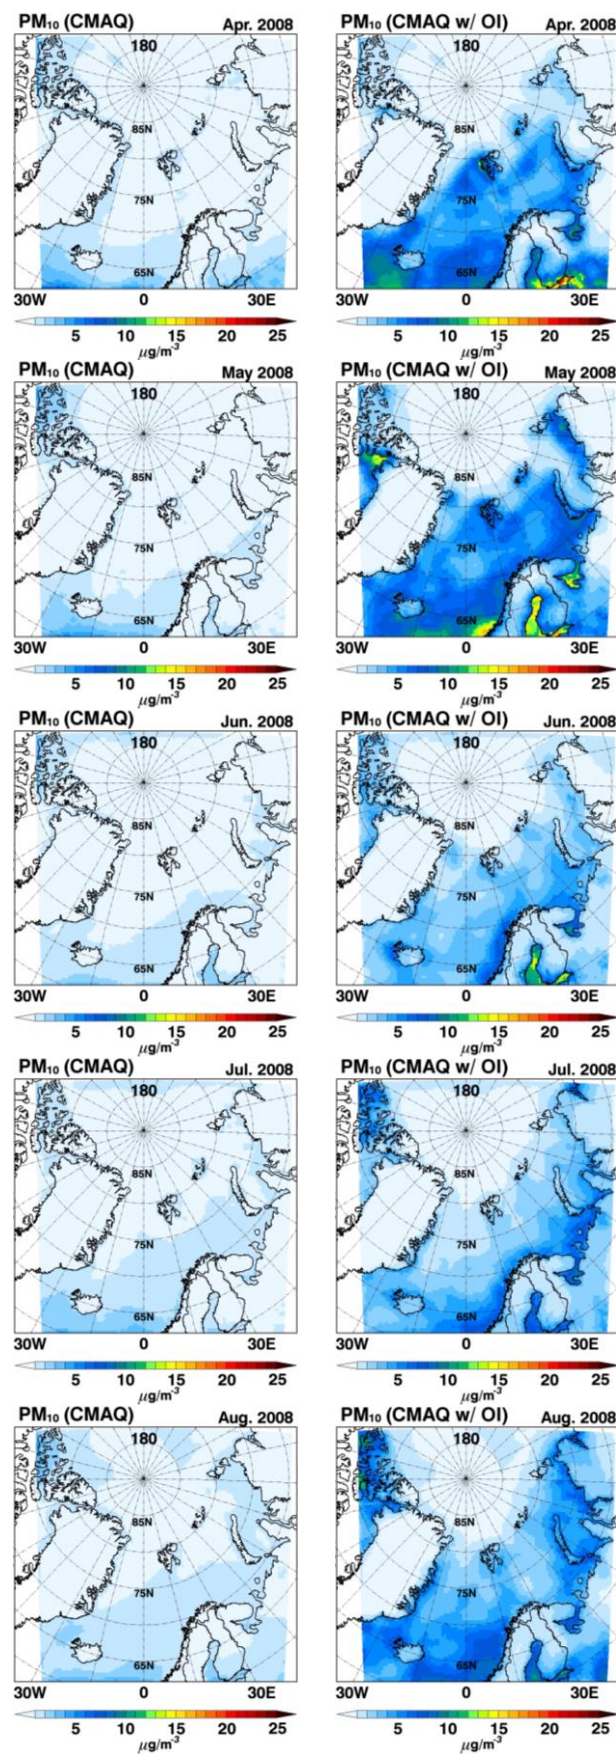

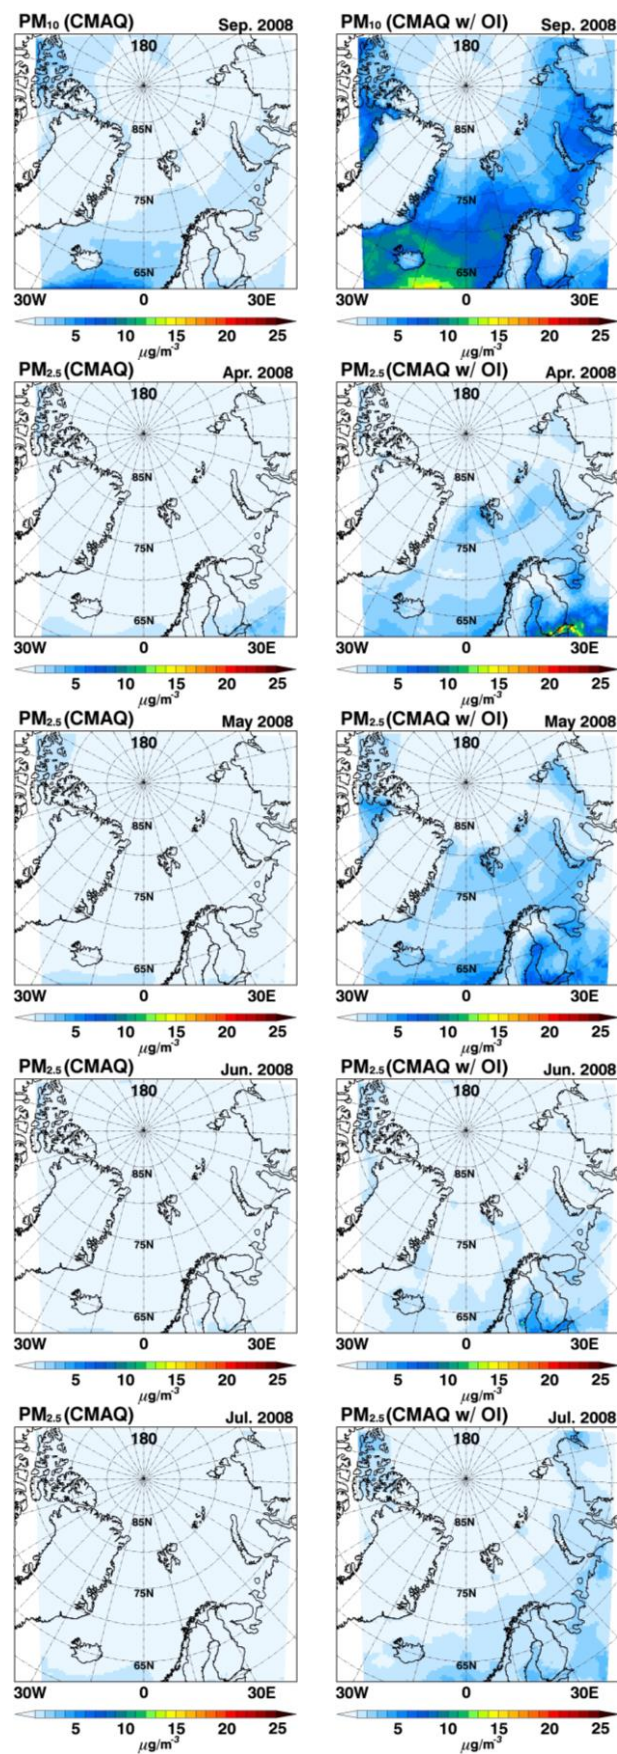

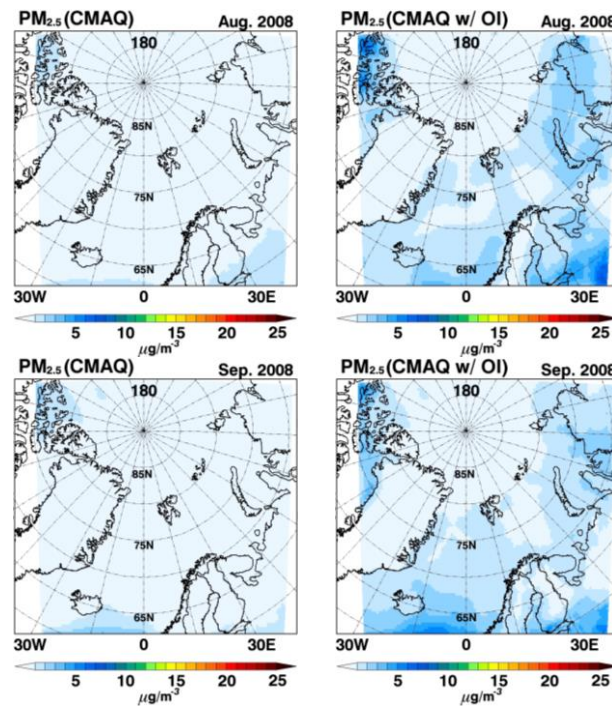

**Figure S4.** Spatial distributions of monthly averaged PM<sub>10</sub> and PM<sub>2.5</sub> calculated from the CMAQ simulations and inferred from the linear relationship between PMs and assimilated AODs

**Table S1.** Monthly mean of PM<sub>10</sub> and PM<sub>2.5</sub> from the CMAQ simulation and linear estimation and their relative differences over the entire domain. .

| Month     | Mean PM <sub>10</sub> ,<br>CMAQ | Mean PM <sub>10</sub> , CMAQ (w/<br>OI) | RD <sub>PM10</sub> @ | Mean PM <sub>2.5</sub> ,<br>CMAQ | Mean PM <sub>2.5</sub> , CMAQ<br>(w/ OI) | RD <sub>PM2.5</sub> # |
|-----------|---------------------------------|-----------------------------------------|----------------------|----------------------------------|------------------------------------------|-----------------------|
| April     | 1.00 (±0.64)*                   | 2.95 (±2.77)                            | 168.52               | 0.54 (±0.39)                     | 1.45 (±1.59)                             | 194.59                |
| May       | 0.92 (±0.58)                    | 3.50 (±2.96)                            | 258.12               | 0.47 (±0.27)                     | 1.68 (±1.38)                             | 281.51                |
| June      | 0.84 (±0.44)                    | 2.18 (±1.71)                            | 154.25               | 0.34 (±0.18)                     | 0.85 (±0.70)                             | 159.55                |
| July      | 0.99 (±0.52)                    | 2.37 (±1.63)                            | 140.80               | 0.44 (±0.19)                     | 1.06 (±0.68)                             | 140.76                |
| August    | 1.10 (±0.55)                    | 3.15 (±2.15)                            | 173.71               | 0.51 (±0.27)                     | 1.39 (±0.98)                             | 185.26                |
| September | 1.08 (±0.84)                    | 3.70 (±3.00)                            | 182.75               | 0.46 (±0.36)                     | 1.30 (±0.88)                             | 241.38                |

\* Mean (± standard deviation), unit (µg m<sup>-3</sup>) .

@ Relative Differences of PM<sub>10</sub> (RD<sub>PM10</sub>) were calculated by following equation:.

$$RD_{PM10} = \frac{PM_{10,CMAQ(w/OI)} - PM_{10,CMAQ}}{PM_{10,CMAQ}} \times 100(\%) \quad (1)$$

# Relative Differences of PM<sub>2.5</sub> (RD<sub>PM2.5</sub>) were calculated by following equation:

$$RD_{PM10} = \frac{PM_{2.5,CMAQ(w/OI)} - PM_{2.5,CMAQ}}{PM_{2.5,CMAQ}} \times 100(\%) \quad (2)$$



**Table S2.** The optimized free parameters obtained from the sensitivity test.

| Month     | $f_m$ | $f_o$ | $\varepsilon_m$ | $\varepsilon_o$ |
|-----------|-------|-------|-----------------|-----------------|
| April     | 3.0   | 0.1   | 0.0             | 0.04            |
| May       | 4.0   | 0.1   | 0.0             | 0.05            |
| June      | 4.0   | 0.6   | 0.0             | 0.05            |
| July      | 2.0   | 0.3   | 0.0             | 0.04            |
| August    | 4.0   | 0.4   | 0.0             | 0.05            |
| September | 5.0   | 0.4   | 0.0             | 0.01            |
